# Supplementary material
Source: publisher site journal article supplement (https://www.spandidos-publications.com/1909/downloadSupplementary)
Supplement: Supplementary file 1 [file downloadSupplementary]

Figure S1. Validation of cyclin D1 expression after cyclin D1 intervention by western blot analysis. Underexpression of cyclin D1 in (A) HB96 and (B) CAL27 cells after transfection with siRNA against cyclin D1. Overexpression of cyclin D1 in (C) HN30 and (D) CAL27 cells after cyclin D1 gene transfection.

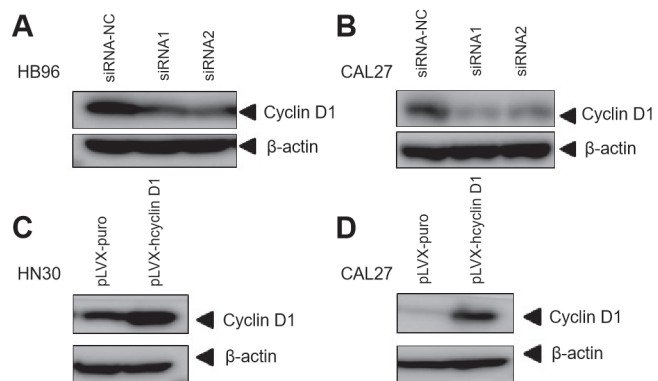

Figure S2. (A) CAL27 and (B) HB96 cells were treated with indicated concentrations of docetaxel, cisplatin and 5-FU altogether following cyclin D1 knockdown, before cell viability was measured, The concentrations of each agent applied, namely docetaxel 0.5 nM, cisplatin 5  $\mu$ M, 5-fluorouracil 5  $\mu$ M were deduced based on the IC<sub>50</sub> from single-agent experiments, followed by 2X dilution. 5-FU, 5-fluorouracil.

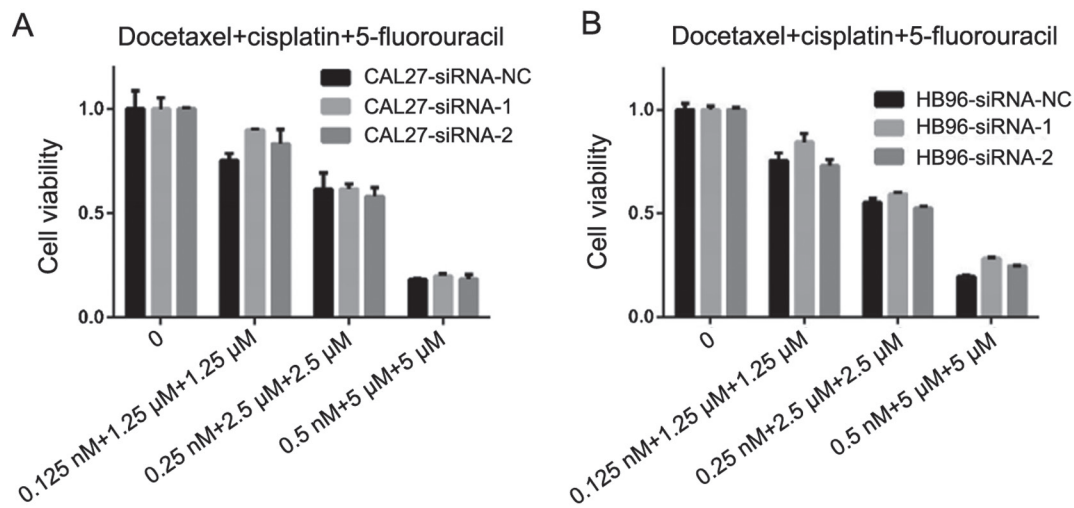

Table SI. Baseline characteristics and cyclin D1 expression in the 232 patients with oral squamous cell carcinoma.

| Characteristics                  | Total patients, n (%) | Cyclin D1 expression level |                   | P-value <sup>a</sup> |
|----------------------------------|-----------------------|----------------------------|-------------------|----------------------|
|                                  |                       | Low (n=155) n (%)          | High (n=77) n (%) |                      |
| Gender                           |                       |                            |                   |                      |
| Male                             | 160 (69.9)            | 103 (66.5)                 | 57 (74.0)         | 0.240                |
| Female                           | 72 (30.1)             | 52 (33.5)                  | 20 (26.0)         |                      |
| Age, years                       |                       |                            |                   |                      |
| <60                              | 157 (65.6)            | 105 (67.7)                 | 52 (74.0)         | 0.974                |
| ≥60                              | 75 (34.4)             | 50 (32.3)                  | 25 (32.5)         |                      |
| Site                             |                       |                            |                   |                      |
| Tongue                           | 98 (44.1)             | 62 (40.0)                  | 36 (46.8)         | 0.366                |
| Buccal                           | 43 (17.6)             | 31 (20.0)                  | 12 (15.6)         |                      |
| Gingiva                          | 38 (15.6)             | 28 (18.1)                  | 10 (13.0)         |                      |
| Floor of mouth                   | 29 (11.7)             | 18 (11.6)                  | 11 (14.3)         |                      |
| Palate                           | 14 (7.0)              | 10 (6.5)                   | 4 (5.2)           |                      |
| Retromolar trigone               | 10 (3.9)              | 4 (2.6)                    | 6 (7.8)           |                      |
| Clinical T stage                 |                       |                            |                   |                      |
| T1/T2                            | 61 (25.8)             | 42 (27.1)                  | 19 (24.7)         | 0.693                |
| T3/T4                            | 171 (74.2)            | 113 (72.9)                 | 58 (75.3)         |                      |
| Clinical N stage                 |                       |                            |                   |                      |
| N0                               | 99 (43.0)             | 65 (41.9)                  | 34 (44.2)         | 0.905                |
| N1                               | 86 (36.7)             | 59 (38.1)                  | 27 (35.1)         |                      |
| N2                               | 47 (20.3)             | 31 (20.0)                  | 16 (20.8)         |                      |
| Clinical stage                   |                       |                            |                   |                      |
| III                              | 160 (69.1)            | 109 (70.3)                 | 51 (66.2)         | 0.526                |
| IVA                              | 72 (30.9)             | 46 (29.7)                  | 26 (33.8)         |                      |
| Pathological differentiation     |                       |                            |                   |                      |
| Well                             | 75 (31.2)             | 49 (31.6)                  | 16 (20.8)         | 0.178                |
| Moderately                       | 156 (64.5)            | 98 (63.2)                  | 58 (75.3)         |                      |
| Poorly                           | 11 (4.3)              | 8 (5.2)                    | 3 (3.9)           |                      |
| Smoking status <sup>b</sup>      |                       |                            |                   |                      |
| Current/former                   | 110 (49.2)            | 69 (44.5)                  | 41 (53.2)         | 0.210                |
| Never                            | 122 (50.8)            | 86 (55.5)                  | 36 (46.8)         |                      |
| Alcohol consumption <sup>c</sup> |                       |                            |                   |                      |
| Positive                         | 88 (40.5)             | 54 (34.8)                  | 34 (44.2)         | 0.168                |
| Negative                         | 144 (59.4)            | 101 (65.2)                 | 43 (55.8)         |                      |

<sup>a</sup> $\chi^2$ -test used to compare the differences in the baseline characteristics between the low and high cyclin D1 expression groups. <sup>b</sup>Former/current smokers defined as ≥1 pack-year history of smoking. <sup>c</sup>Positive alcohol consumption was defined as current alcohol consumption of >1 drink per day for 1 year (12 ounces of beer with 5% alcohol, 5 ounces of wine with 12-15% alcohol or one ounce of liquor with 45-60% alcohol). All other patients were classified as negative alcohol consumption.

Table SII. Calculated 5-year survival rate of the patients with low and high Cyclin D1 expression<sup>a</sup>.

| Calculated 5-year survival rate            | Patients with low cyclin D1 expression, % | Patients with high cyclin D1 expression, % |
|--------------------------------------------|-------------------------------------------|--------------------------------------------|
| Overall survival rate                      | 69.0                                      | 48.5                                       |
| Disease-free survival rate                 | 60.5                                      | 41.1                                       |
| Locoregional recurrence-free survival rate | 61.1                                      | 44.8                                       |
| Distant metastasis-free survival rate      | 68.3                                      | 47.6                                       |

<sup>a</sup>The cyclin D1 expression index was determined on the basis of the proportion of stained cells using a semi-quantitative scale: i) Negative,  $\leq 10\%$  of stained cells; ii) weakly positive,  $< 50\%$  of stained cells; and iii) strong positive,  $\geq 50\%$  of stained cells. Low cyclin D1 expression was defined as negative and weakly positive cyclin D1 expression, whilst high cyclin D1 expression was defined as strong positive cyclin D1 expression.

Table SIII. IC<sub>50</sub> values of docetaxel, cisplatin or 5-FU for each cell line with cyclin D1 intervention.

| Cells                 | Docetaxel, nM | Cisplatin, $\mu$ g/ml | 5-FU, $\mu$ g/ml |
|-----------------------|---------------|-----------------------|------------------|
| HB96-siRNA-NC         | 1.47          | 0.40                  | 0.20             |
| HB96-siRNA1           | 7.62          | 1.04                  | 0.98             |
| HB96-siRNA2           | 4.92          | 0.90                  | 0.83             |
| CAL27-siRNA-NC        | 5.60          | 0.58                  | 0.85             |
| CAL27-siRNA1          | 7.78          | 1.20                  | 1.12             |
| CAL27-siRNA2          | 20.13         | 1.00                  | 0.99             |
| CAL27-pLVX-puro       | 0.64          | 0.98                  | 3.76             |
| CAL27-pLVX-hcyclin D1 | 0.30          | 0.69                  | 2.34             |
| HN30-pLVX-puro        | 1.98          | 2.67                  | 0.10             |
| HN30-pLVX-hcyclin D1  | 0.47          | 0.70                  | 0.07             |

5-FU, 5-fluorouracil; siRNA, small interfering RNA; NC, negative control.
